# Supplementary material for: Discrepancies between MICS-Asia III simulation and observation for surface ozone in the marine atmosphere over the northwestern Pacific Asian Rim region
Source: Copernicus journal article supplement (doi:10.5194/acp-20-15003-2020), 2020-12-04
Supplement: Supplementary file 1 [file acp-20-15003-2020-supplement.pdf]

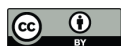

*Supplement of*

## **Discrepancies between MICS-Asia III simulation and observation for surface ozone in the marine atmosphere over the northwestern Pacific Asian Rim region**

**Hajime Akimoto et al.**

*Correspondence to:* Hajime Akimoto ([akimoto.hajime@nies.go.jp](mailto:akimoto.hajime@nies.go.jp))

The copyright of individual parts of the supplement might differ from the CC BY 4.0 License.

## Supplemental Figures

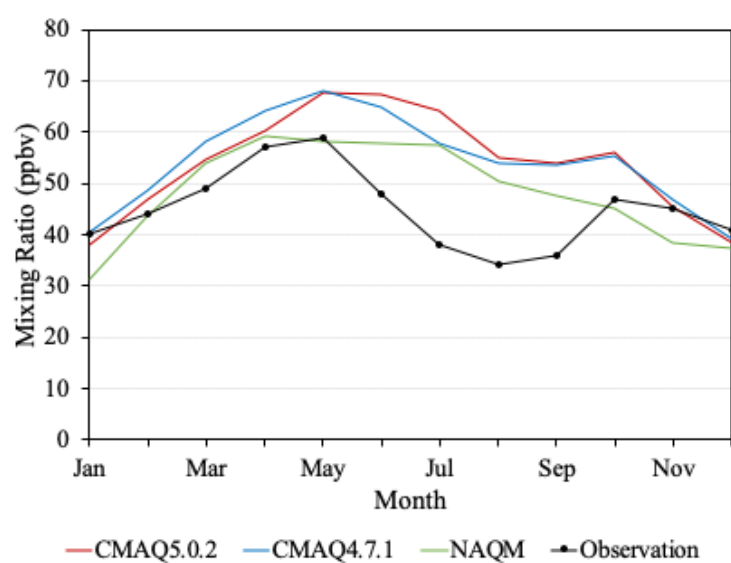

Fig. S1 Comparison of seasonal variation of O<sub>3</sub> at Oki in 2010 between the observation and model simulation by CMAQ v.5.0.2, CMAQ v. 4.7.1 and NAQM v.3.

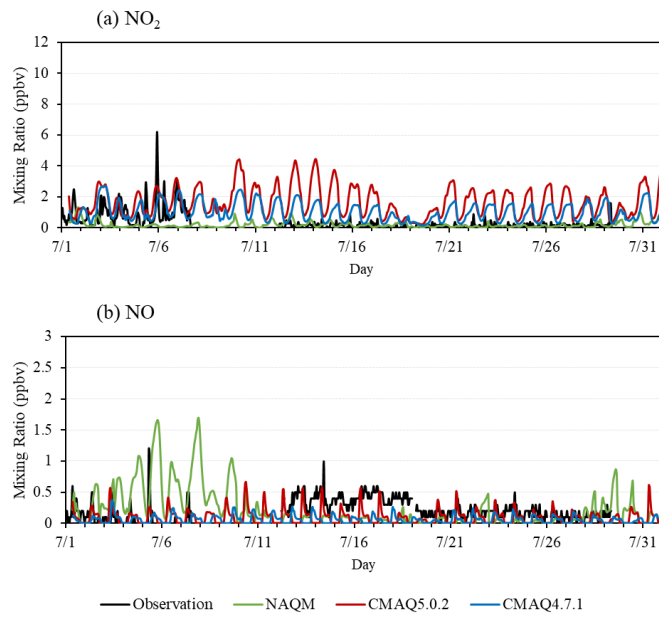

Fig. S5-1 (a) Mixing Ratios of  $\text{NO}_2^*$  by observation,  $\text{NO}_2$  by NAQM, CMAQ v.5.0.2, and CMAQ v. 4.7.1 at Hedo in July 2010. (b) Same as (a) but for NO.

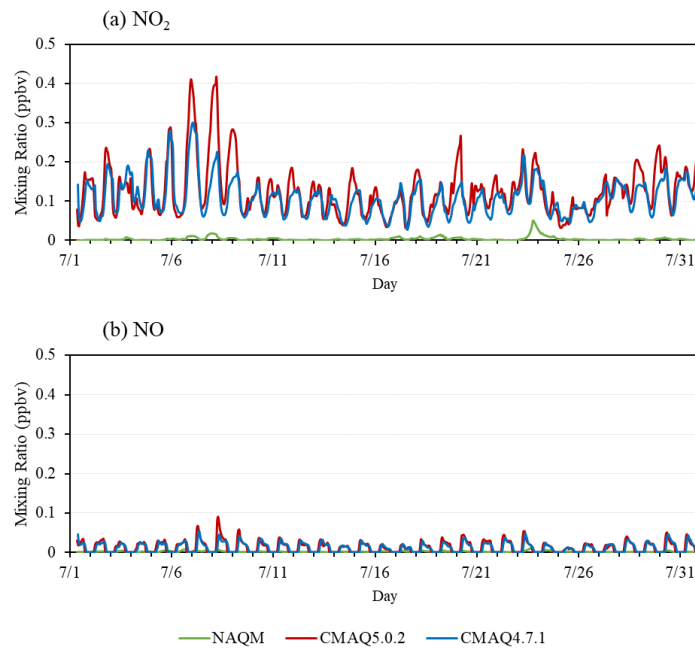

Fig. S5-2 (supplement) (a) Mixing Ratios  $\text{NO}_2$  by NAQM, CMAQ v.5.0.2, and CMAQ v. 4.7.1 at Ogasawara in July 2010. (b) Same as (a) but for NO.

(a) NAQM

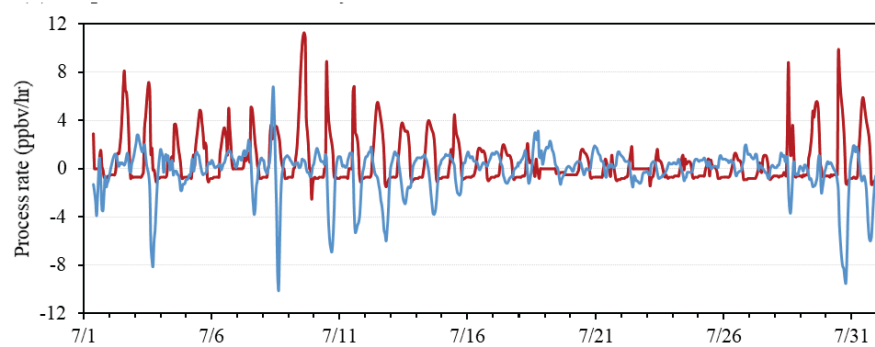

(b) CMAQ v.5.0.2

5.0.2

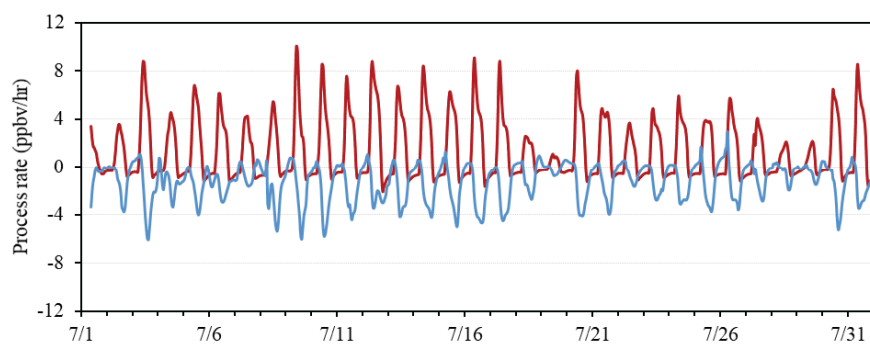

(b) CMAQ v.4.7.1

7.1

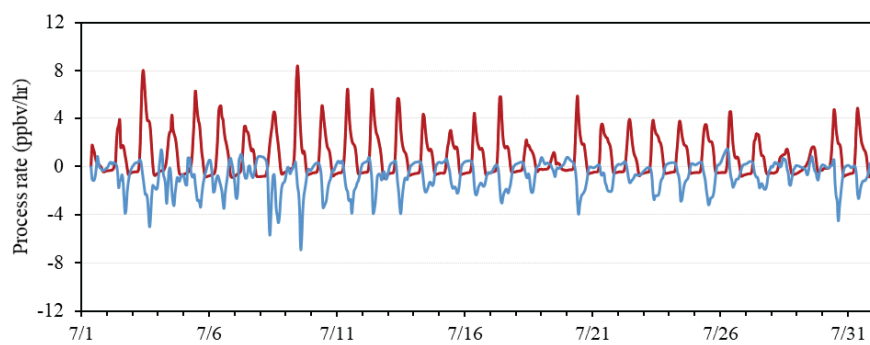

Fig. S6-1 Model-calculated net chemical production and net transport of  $O_3$  at Hedo in July 2010 by (a) NAQM, (b) CMAQ5.0.1 and (c) CMAQ 4.7.1.

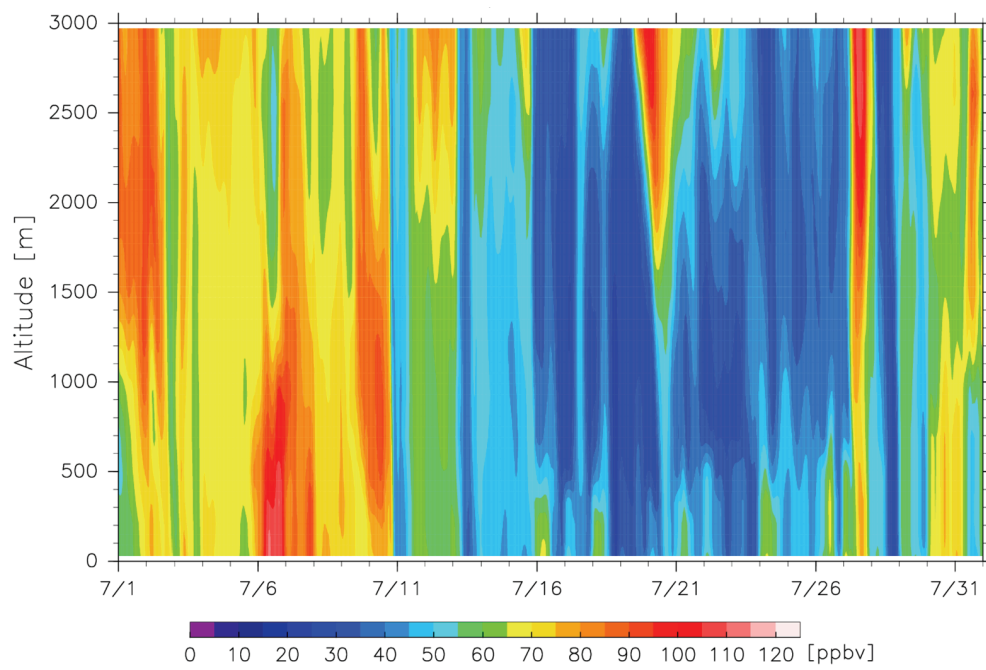

Fig. S6-2 Calculated vertical profile of O<sub>3</sub> at Oki in June, 2010.
